# Supplementary material
Source: publisher figshare collection journal article supplement (https://tandf.figshare.com/ndownloader/files/15330635)
Supplement: Supplementary file 1 [file 15330635]

**Supplementary data**

# An explorative study on Staphyloccocus aureus MurE inhibitor: Induced fit docking, binding free energy calculation and molecular dynamics

Mohammed Afzal Azam1*, Niladiri Saha1, Srikanth Jupudi1

*1Department of Pharmaceutical Chemistry, JSS College of Pharmacy, Ooty- 643001, Tamil Nadu, India (A Constituent College of Jagadguru Sri Shivarathreeswara Academy of Higher Education and Research, Mysuru).*

E-mail: [afzal9azam@hotmail.com](mailto:afzal9azam@hotmail.com)

Tel: +91-423-2443393; Fax: +91-4232442937


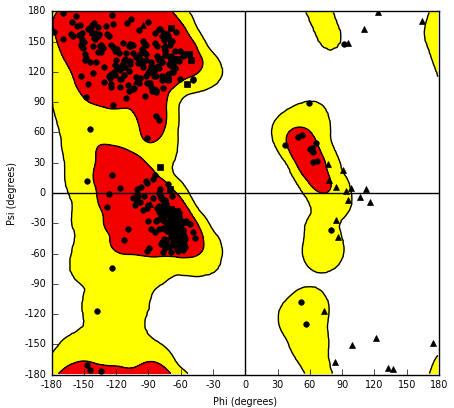


**Figure S1.** Ramachandran plot of *Staphyloccocus aureus* MurE (PDB-ID: 4C13).

| 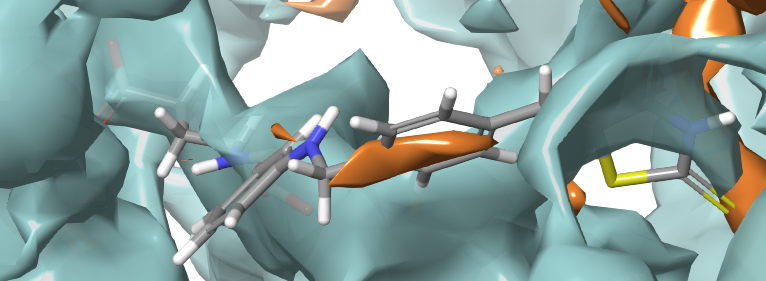  **a** |
| --- |
| 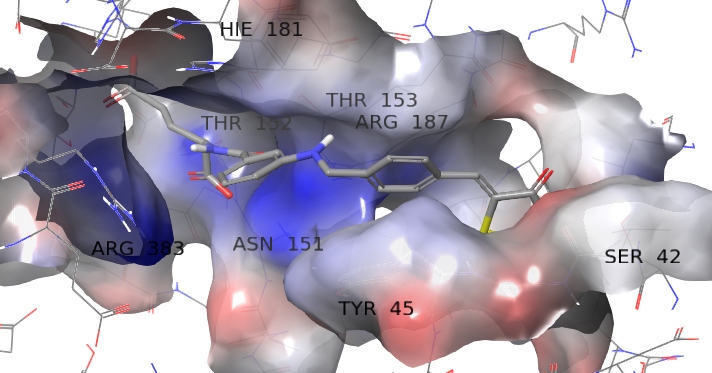  **b** |

**Figure S2**. (a) Map of hydrophobic and hydrophilic fields for inhibitor **1(**cyan and brown shades represent hydrophilic and hydrophobic regions, respectively). (b) The electrostatic field of binding surface area of *S. aureus* MurE (PDB-ID: 4C13) catalytic pocket with inhibitor.


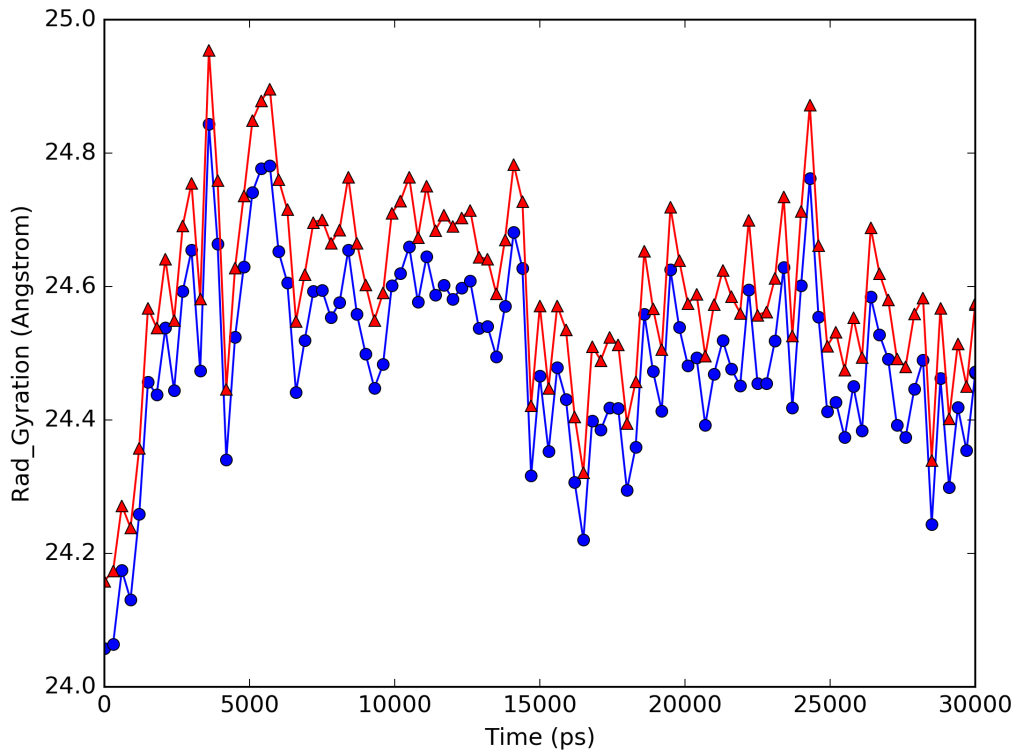


**Figure S3**. Represents the RMSDs of (a) back bone (red triangle) and (b) C-α atoms (blue circle) of catalytic pocket residues of *S. aureus* MurE protein (PDB-ID: 4C13) with reference to the initial reference structure during MD simulation.


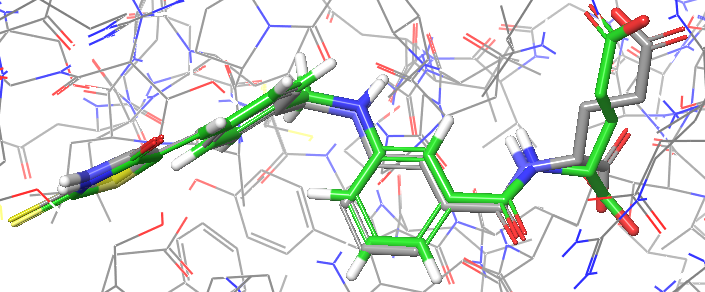


**Figure S4**. Represents the overlay of the conformation of induced fit docked pose (grey) with the conformation of co-crystallized ligand (green) in the catalytic pocket of *S. aureus* MurE enzyme (PDB-ID: 4C13) [RMSD: 0.790].

**Figure S5**. Represents RMSF profile of catalytic pocket residues of 4C13 during MD simulation through 0 to 30 ns.

**Figure S6**. Time line representation of inhibitor **1** and modeled *S. aureus* MurD enzyme contacts during 30 ns simulation.

| **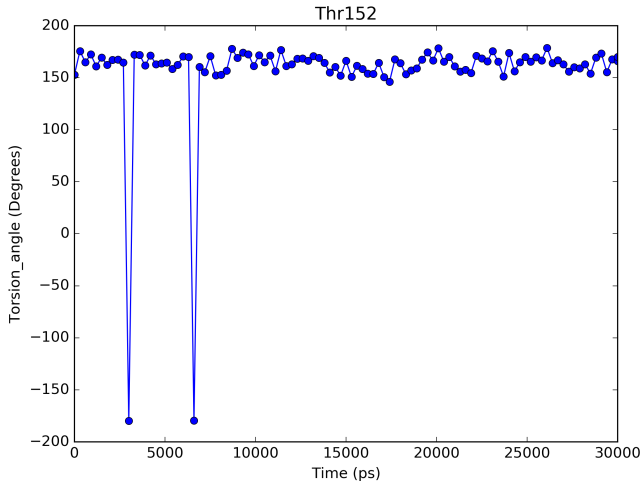**  **a** | **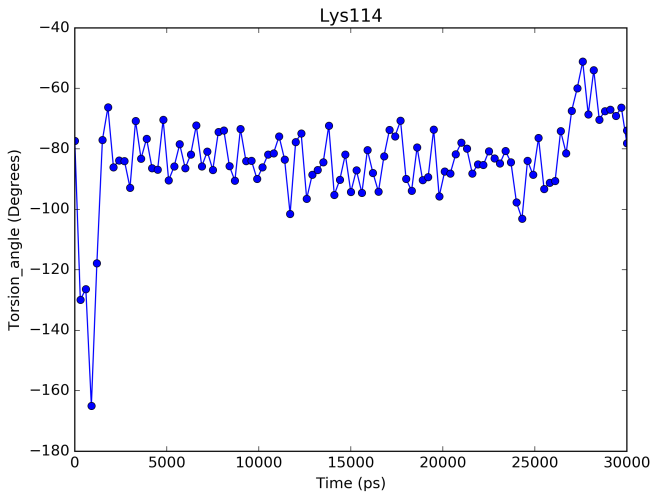**  **b** |
| --- | --- |
| **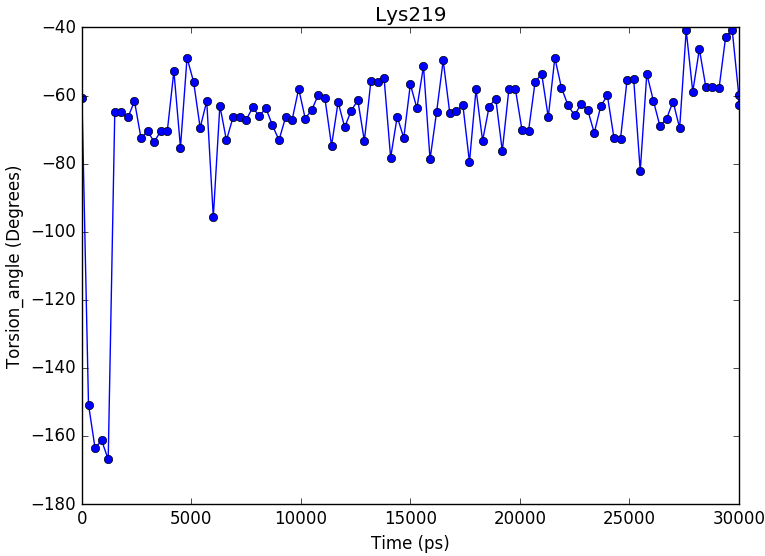** | 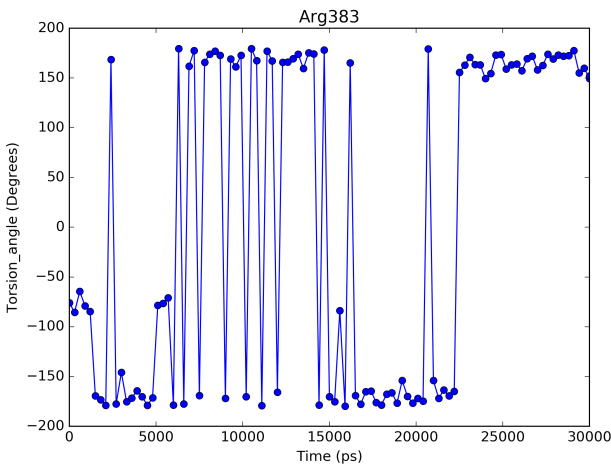  **c**  **d** |

**Figure S7**. Represents torsion angles of bonds observed for (a) Ly114 (b) Thr152 (c) Lys219 (d) Arg383 binding residues of *S. aureus* MurE during 30 ns MD simulation

**Figure S8**. Represents change in ΔGbind (kcal/mol) during 30 ns MD simulation.

**Figure S9**. RMSD: Root mean square deviation of a ligand with respect to the reference conformation; rGyr: Radius of Gyraion which measures the 'extendedness' of a ligand; intraHB: Intramolecular Hydrogen Bonds; MolSA: Molecular Surface Area; SASA: Solvent Accessible Surface Area; PSA: Polar Surface Area.


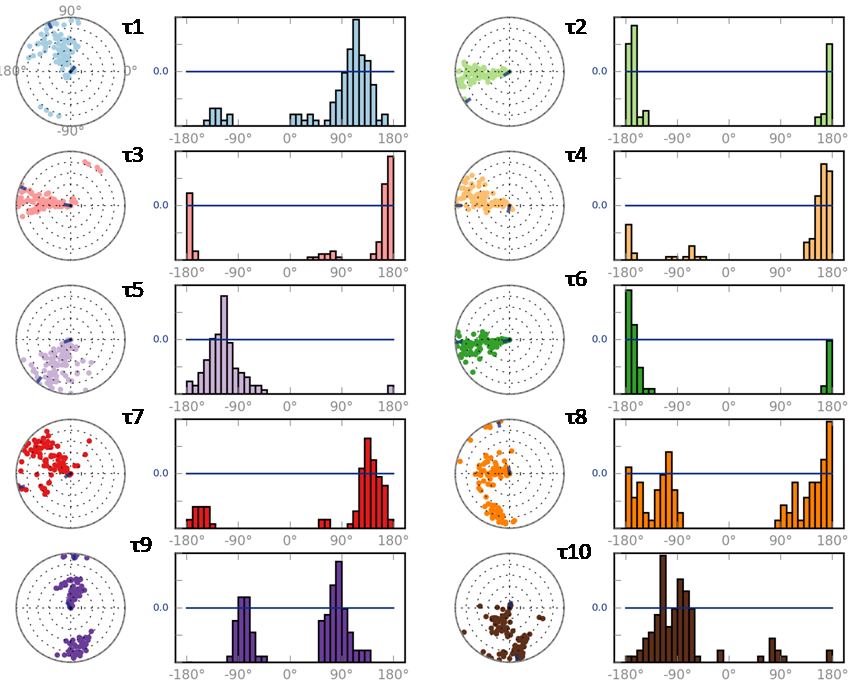


**Figure S10**. Torsions plot represent the inhibitor **1** conformational evolution of the every rotatable bond throughout the simulation trajectory (0.00 through 40.00 ns).


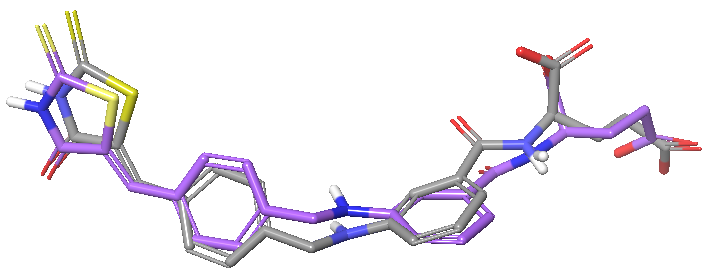


**Figure S11**. Represents the overlay of the conformation of induced fit docked pose (grey) with the conformation of MD pose (green yellow) in the catalytic pocket of *S. aureus* MurE enzyme (PDB-ID: 4C13) [RMSD: 0.915Å].


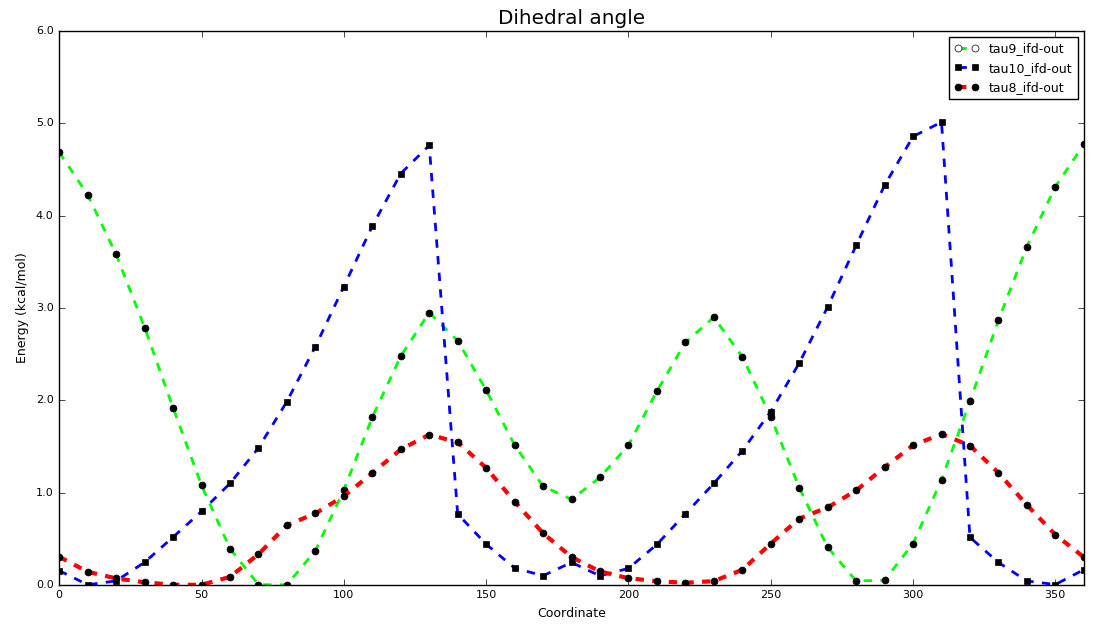


**a**

**b**

**c**

**Figure S12**. Represents the coordinate scan for the dihedral (a) τ8 (dashed red color), (b) τ9 (dashed green color) and (c) τ10 (dashed blue color) using molecular mechanics and the OPLS3 force field.

| 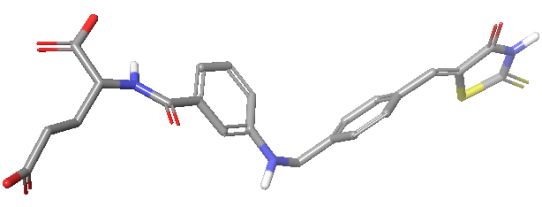  **a**  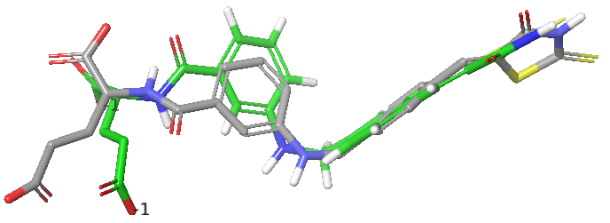 | 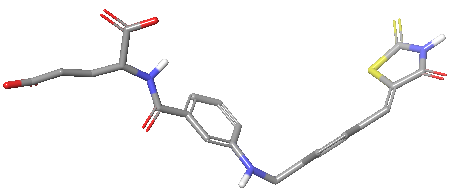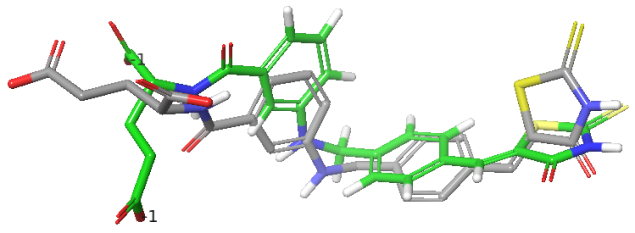  **b** |
| --- | --- |
| 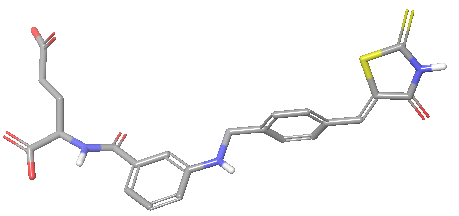  **c**  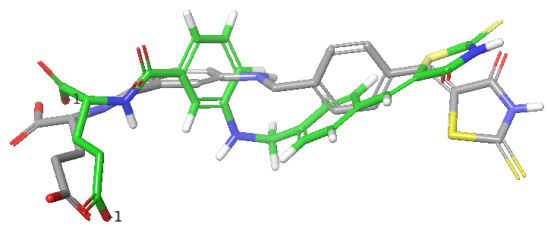 | |

**Figure S13**. Most energetically favorable pose of inhibitor **1** (grey color) (a) after the **τ8** dihedral scan (upside) showing RMSD of 1.90 Å (b) after the **τ9** dihedral scan (left hand side) showing RMSD of 2.46 Å (c) after the **τ10** dihedral scan (left) showing RMSD of 2.71 Å after superposition (below) with the pose of X-ray co-crystal structure (green color).

**Table 4**. The extra precision docking score and contribution to the binding free energy (MM-GBSA) (kcal mol-1) between compounds **D1-D3** and *S*.*aureus* MurE (PDB ID: 4C13).

| Comp. | Extra-precision docking score | | | | | Contribution to the binding free energy | | | | | | |
| --- | --- | --- | --- | --- | --- | --- | --- | --- | --- | --- | --- | --- |
| agscore | bgemodel | cgenergy | dgecou | egevdW | fΔGBind | gΔGCoul | hΔGCov | iΔGHB | jΔGLipo | kΔGSolv | lΔGvdW |
| **D1** | -9.92 | -66.72 | -49.80 | -30.00 | -19.80 | -78.37 | -2.74 | 1.47 | -4.28 | -5.91 | -90.02 | -28.53 |
| **D2** | -10.15 | -82.69 | -63.32 | -30.47 | -29.86 | -75.49 | -5.08 | 2.9 | -6.83 | -15.58 | -81.85 | -42.35 |
| **D4** | -10.36 | -69.12 | -50.16 | -32.81 | -17.34 | 83.17 | -6.54 | 6.44 | -8.40 | -9.75 | -65.42 | -28.03 |
| **D5** | -9.76 | -65.56 | -49.95 | -27.02 | -22.92 | 76.89 | -4.25 | 0.9 | -8.67 | -9.10 | -40.24 | -29.50 |

Notes: aglide score; bglide model energy; cglide energy; dglide Coulomb energy; eglide van der Waals energy; ffree energy of binding; gCoulomb energy; hcovalent energy (internal energy); ihydrogen bonding energy; jhydrophobic energy (non-polar contribution estimated by solvent accessible surface area); kelectrostatic solvation energy; lvan der Waals energy.

| 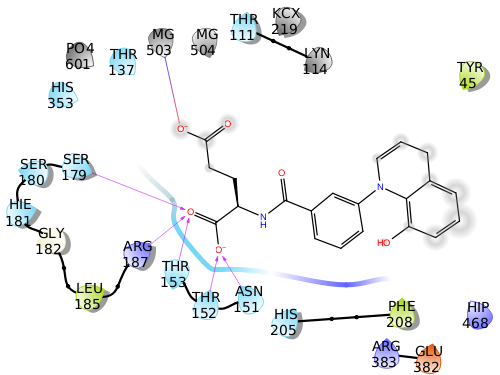  **a** | 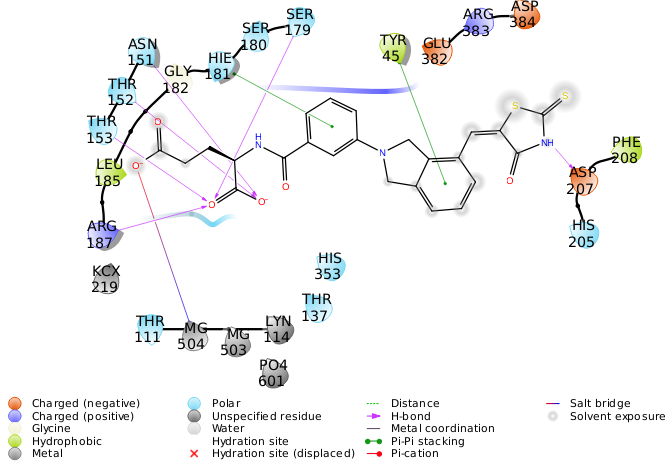  **b** |
| --- | --- |
| 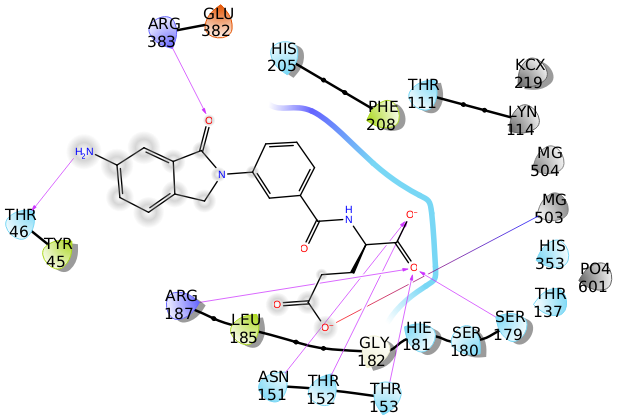  **c** | 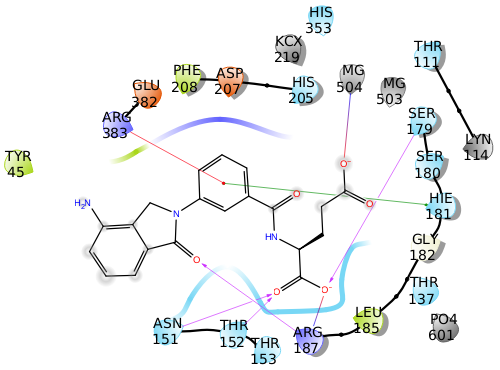  **d** |

**Figure S14.** Represents interactions of designed inhibitors (a) **D1** (b) **D2** (c) **D3** (d) **D4** within the catalytic pocket of *S. aureus* MurE(PDB-ID: 4C13).


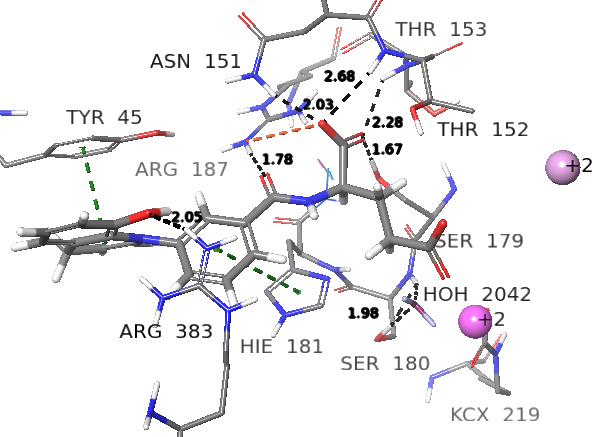


**b**

**a**


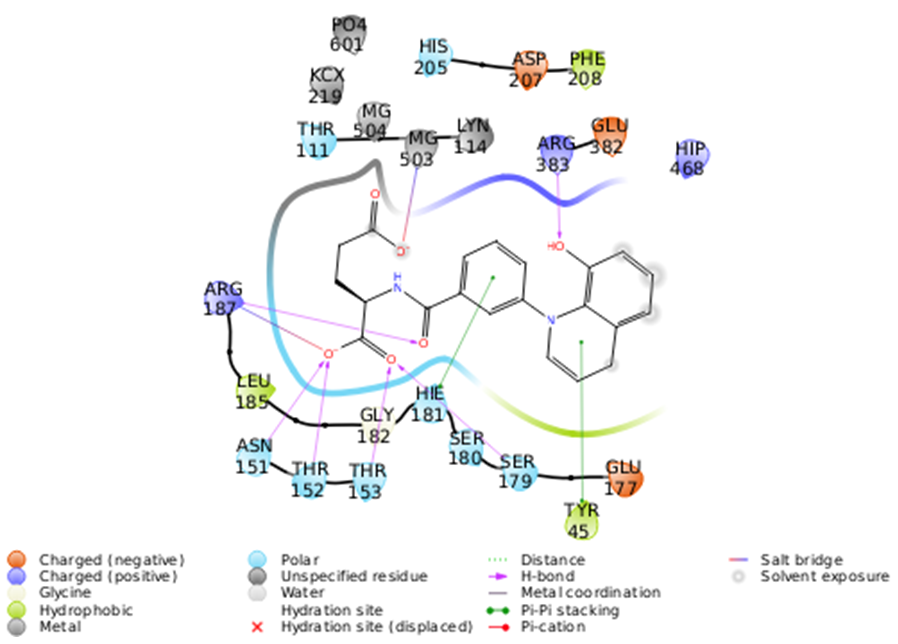


**Figure S15.** Represents (a) 3D and (b) 2D interaction diagrams of highest score IFD pose of designed inhibitor **D1** within the catalytic pocket of 4C13.

| 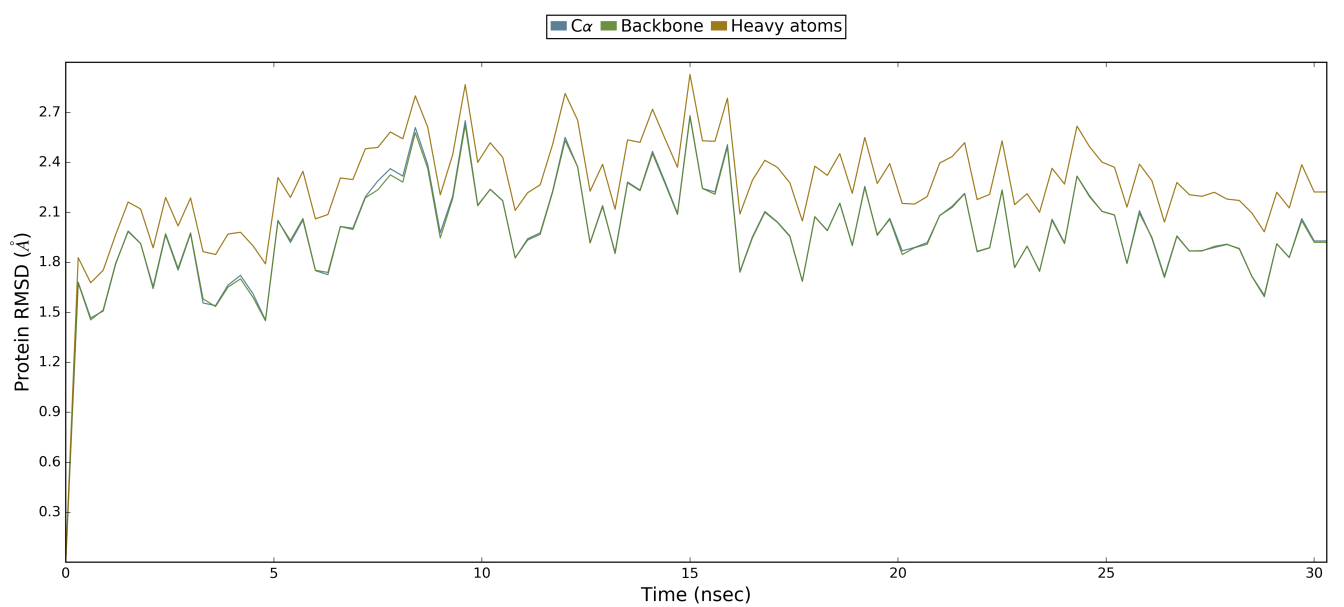  **a** |
| --- |
| **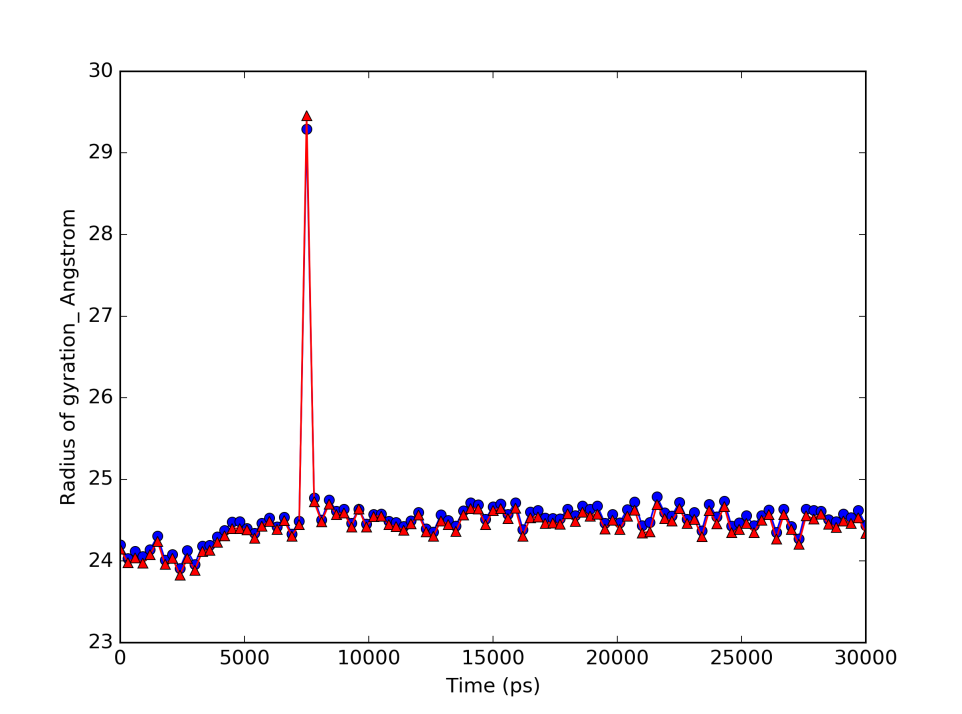**  **b** |
| **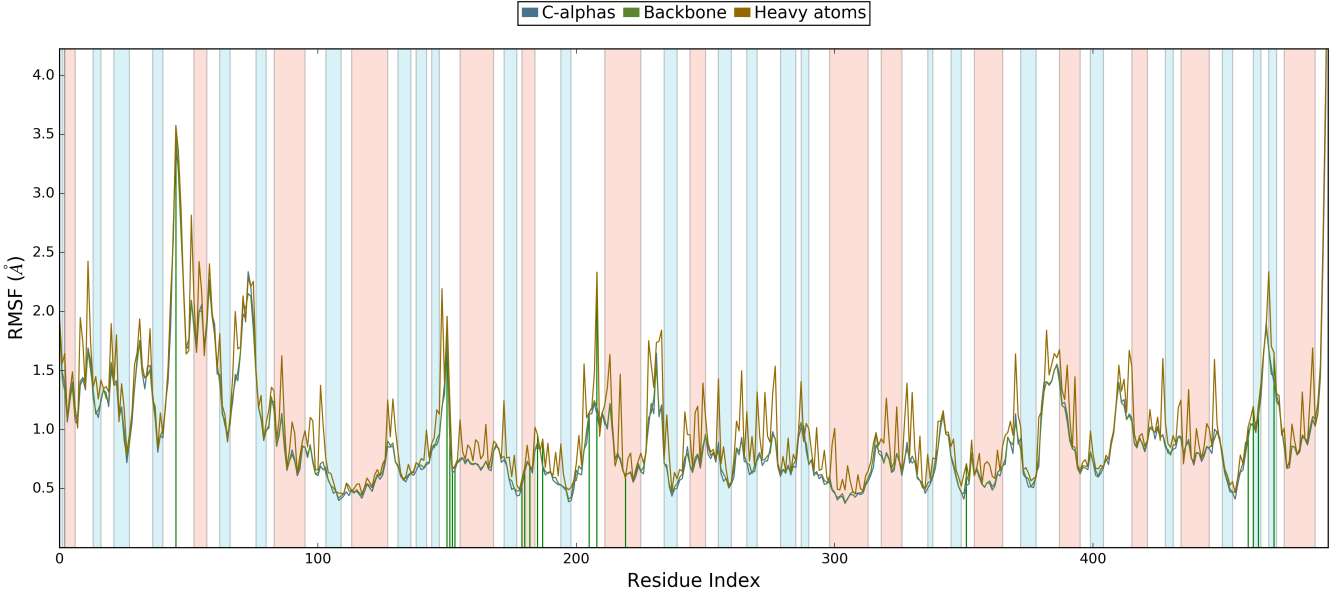**  **c** |
| **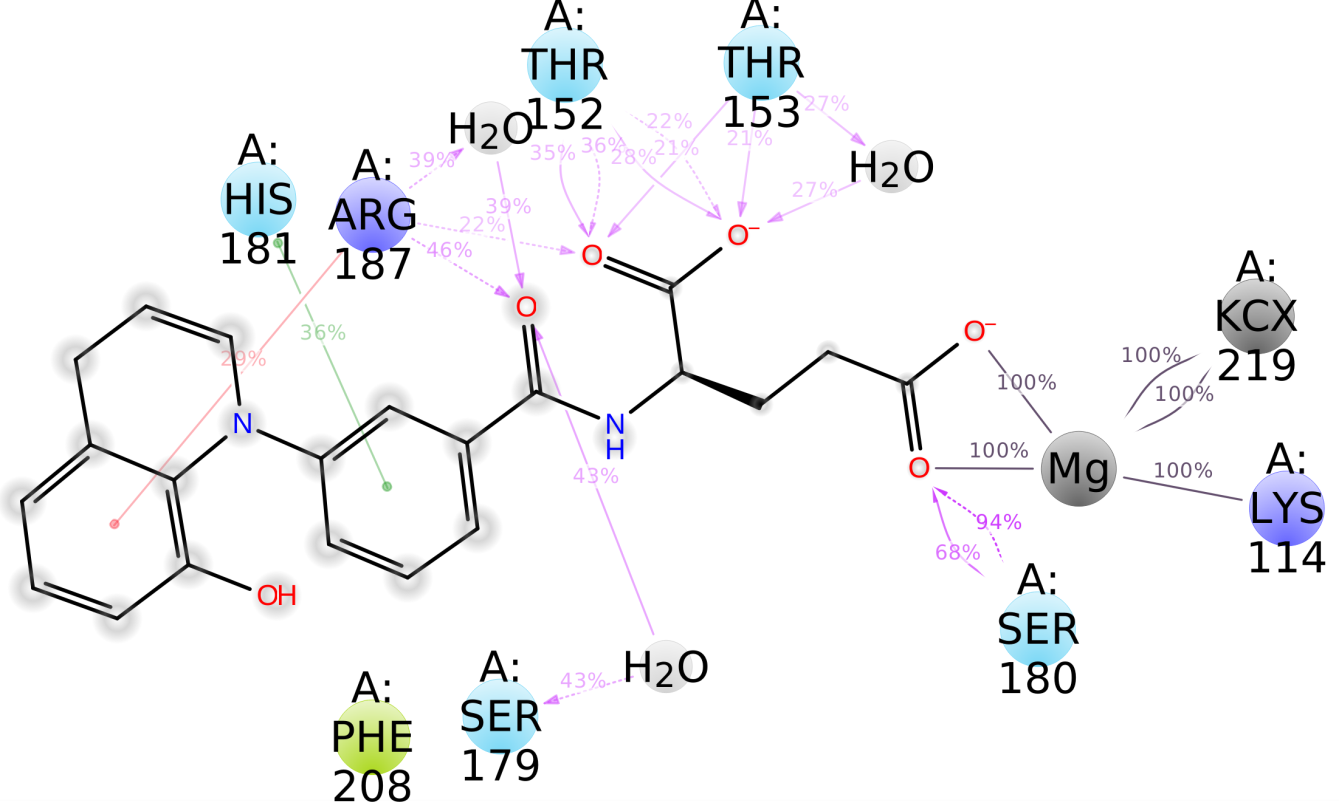**  **d** |
| 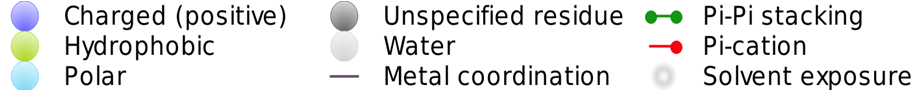 |

**Figure S16**. (a) Represents RMSD profile of C-α and backbone atoms (b) The RMSF profile of modeled *S. aureus* MurD enzyme. (c) rGyr of *S. aureus* MurE C-α and backbone atoms during MD simulation (d) 2D interaction diagram of designed molecule **D1** with catalytic pocket residues of *S. aureus* MurE during 30 ns MD simulation.


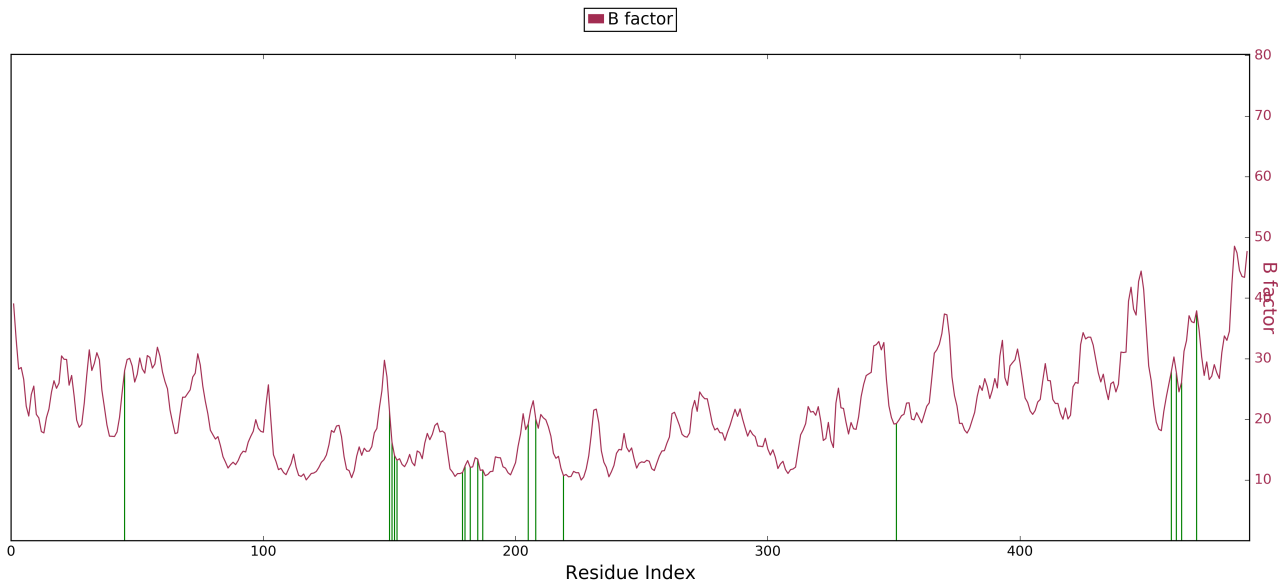


**Figure S17.** Represents B-factor profile of catalytic pocket binding residues during 30 ns MD simulation of **D1**/4C13 complex.
